# Supplementary material for: Ultrafast processes triggered by one- and two-photon excitation of a photochromic and luminescent hydrazone
Source: publisher site journal article supplement (doi:10.3762/bjoc.15.236), 2019-10-15
Supplement: Additional file 1 [file 1860-5397-15-236-S1.pdf]

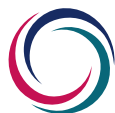

## Supporting Information

for

### **Ultrafast processes triggered by one- and two-photon excitation of a photochromic and luminescent hydrazone**

Alessandro Iagatti, Baihao Shao, Alberto Credi, Barbara Ventura, Ivan Aprahamian and Mariangela Di Donato

*Beilstein J. Org. Chem.* **2019**, *15*, 2438–2446. [doi:10.3762/bjoc.15.236](https://doi.org/10.3762/bjoc.15.236)

## Additional spectra

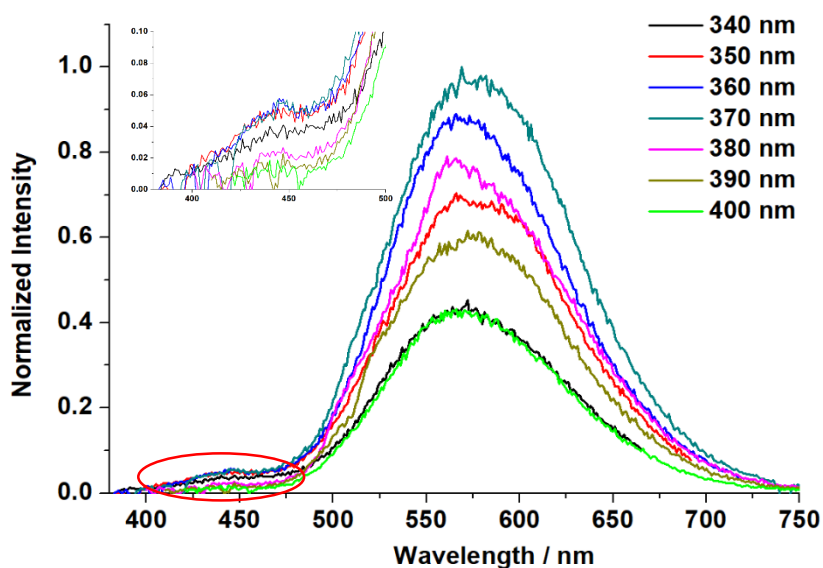

**Figure S1:** Fluorescence emission spectra of the *E*-rich solution of **1** ( $1 \times 10^{-5}$  M; MeCN) upon excitation at various wavelengths (from 340 to 400 nm); The inset shows the zoom-in on the spectra between 380 and 500 nm (*E*-rich solutions were obtained upon irradiation at 442 nm to reach the PSS ( $1-E > 99\%$ )).

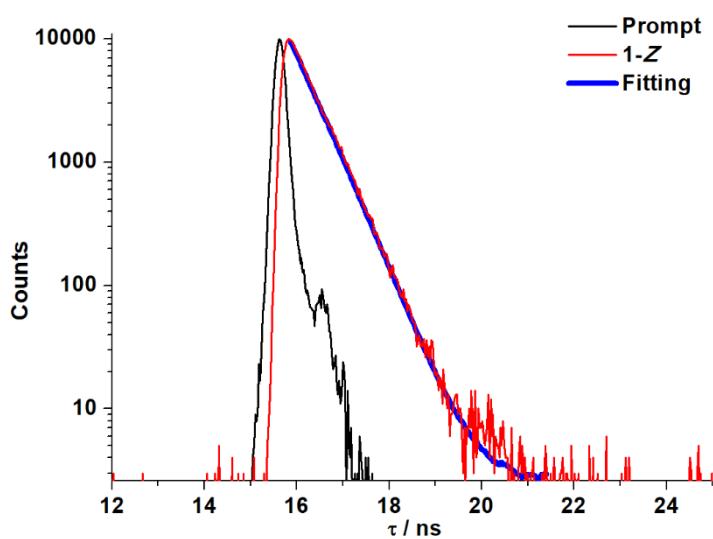

**Figure S2:** Fluorescence lifetime decay of **1-Z** ( $5 \times 10^{-6}$  M) in acetonitrile. The fluorescence decay lifetime was determined to be  $479 \pm 3$  ps based on three consecutive measurements.

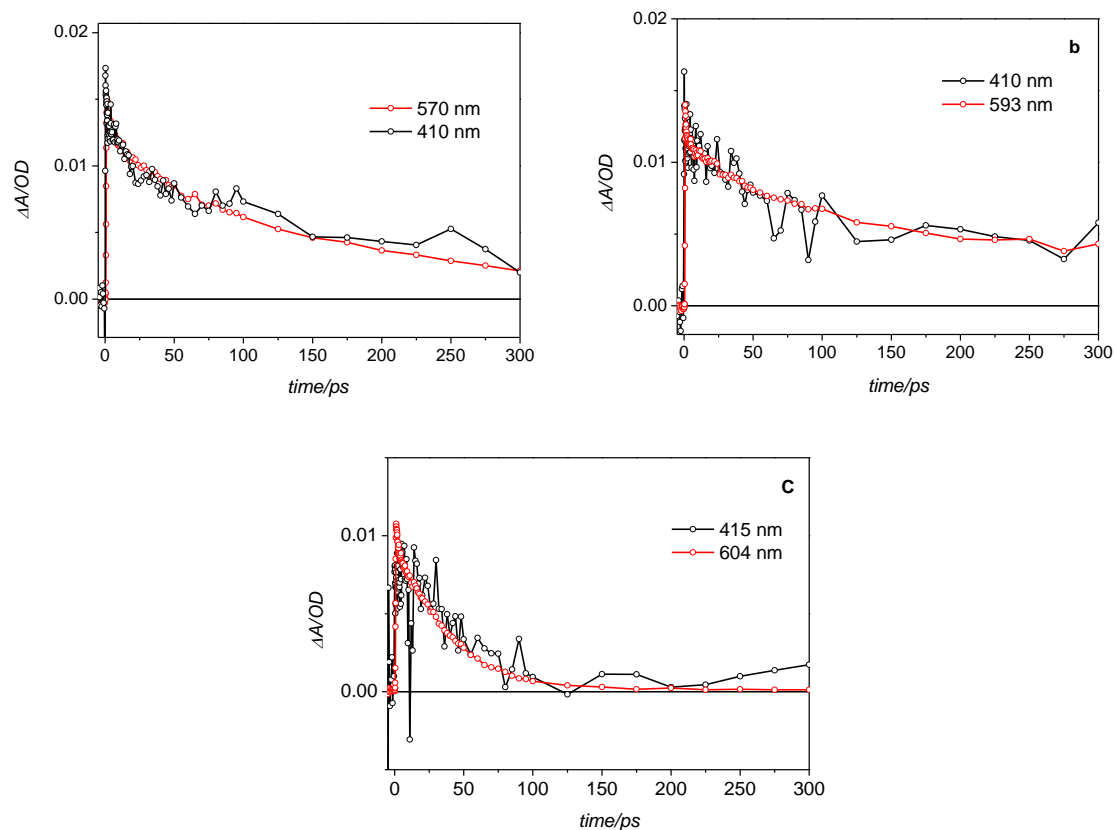

**Figure S3:** Comparison between the kinetics recorded in the bleaching (black) and ESA (red) region for a) toluene; b) acetonitrile; c) methanol. The sign of kinetic trace in the bleaching region has been inverted for comparison. The intensity of the ESA kinetics has been scaled as to match that of the bleaching one.

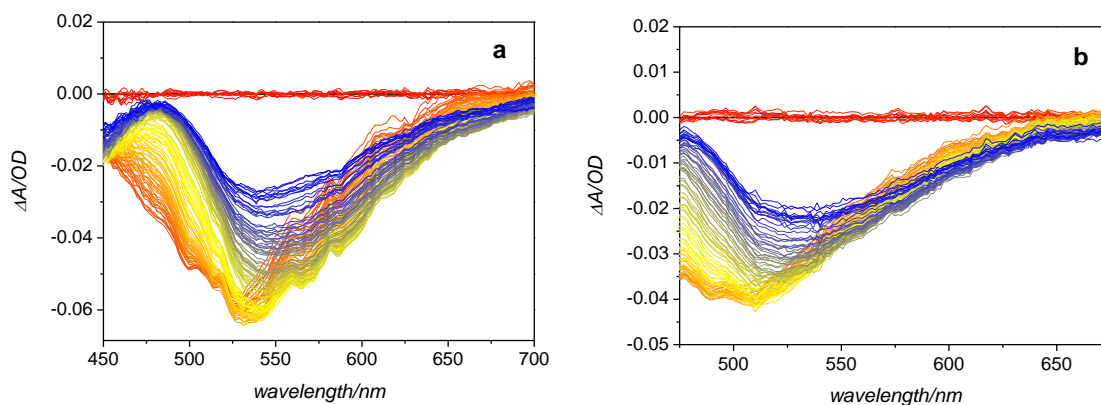

**Figure S4:** Transient absorption spectra of a solution of Cumarin 153 in ethanol registered upon a) one-photon excitation at 400 nm; b) two-photon excitation at 785 nm. Color code from red to blue indicates a timescale spanning from -5 ps to 1.5 ns.
